# Supplementary material for: Bacterial Adhesion of TESPSA and Citric Acid on Different Titanium Surfaces Substrate Roughness: An In Vitro Study with a Multispecies Oral Biofilm Model
Source: MDPI journal article supplement (doi:10.3390/ma16134592), 2023-06-25
Supplement: s1 [file s1]

Supplementary files

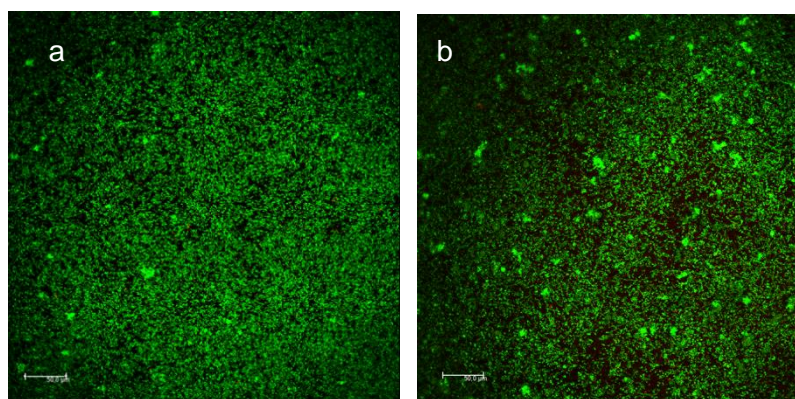

**Figure S1.** CLSM images from *L* surface at (a) 12 and (b) 24 h at 25x.

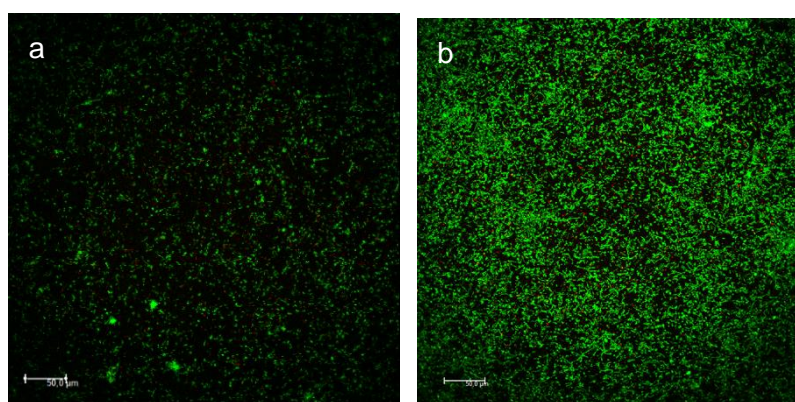

**Figure S2.** CLSM images from *L-TESPSA surface* at (a) 12 and (b) 24 h at 25x.

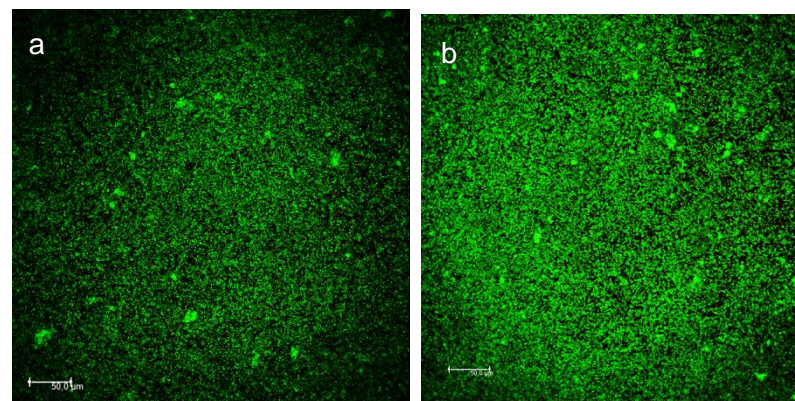

**Figure S3.** CLSM images from *M surface* at (a) 12 and (b) 24 h at 25x.



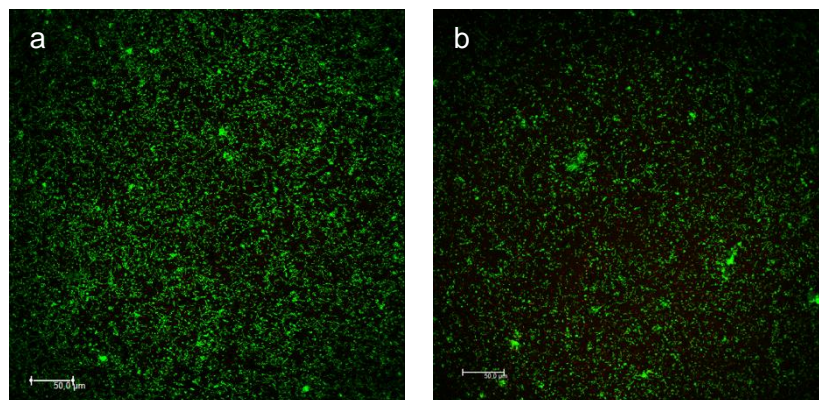

**Figure S4.** CLSM images from *M-TESPSA* surface at (a) 12 and (b) 24 h at 25x.

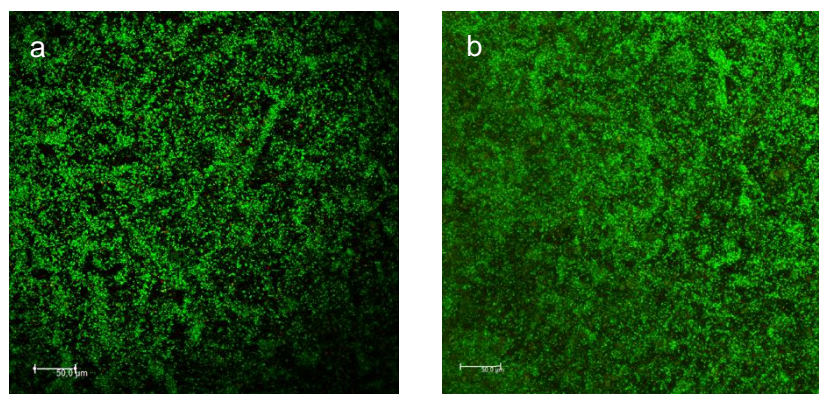

**Figure S5.** CLSM images from *H* surface at (a) 12 and (b) 24 h at 25x.

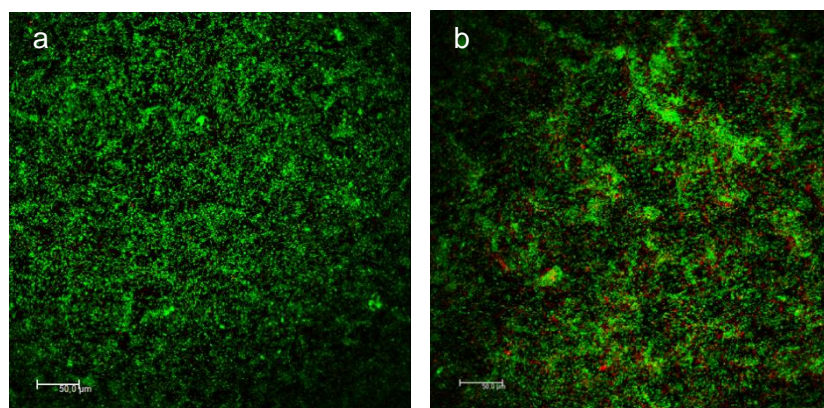

**Figure S6.** CLSM images from *H-TESPSA* surface at (a) 12 and (b) 24 h at 25x.

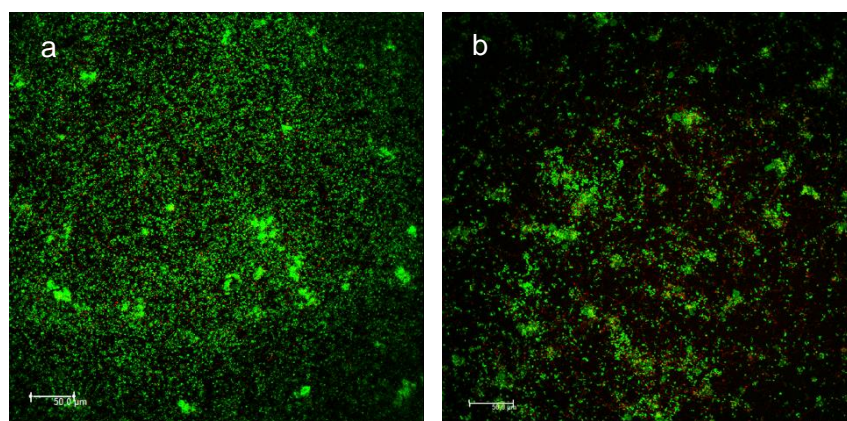

**Figure S7.** CLSM images from CA surface at (a) 12 and (b) 24 h at 25x.

**Table S1.** *P* values comparisons of the total bacterial load adhered to each surface measured by qPCR at 12 h.

| Surface name     | <i>L</i> | <i>L</i> -TESPSA | <i>M</i> | <i>M</i> -TESPSA | <i>H</i> | <i>H</i> -TESPSA |
|------------------|----------|------------------|----------|------------------|----------|------------------|
| <i>L</i> -TESPSA | 0.500    |                  |          |                  |          |                  |
| <i>M</i>         | 0.248    | 0.217            |          |                  |          |                  |
| <i>M</i> -TESPSA | 0.443    | 0.420            | 0.326    |                  |          |                  |
| <i>H</i>         | 0.487    | 0.458            | 0.304    | 0.515            |          |                  |
| <i>H</i> -TESPSA | 0.168    | 0.252            | 0.449    | 0.199            | 0.174    |                  |
| CA               | 0.441    | 0.412            | 0.41     | 0.347            | 0.367    | 0.124            |

**Table S2.** *P* values comparisons of the total bacterial load adhered to each surface measured by qPCR at 24 h.

| Surface name     | <i>L</i> | <i>L</i> -TESPSA | <i>M</i> | <i>M</i> -TESPSA | <i>H</i> | <i>H</i> -TESPSA |
|------------------|----------|------------------|----------|------------------|----------|------------------|
| <i>L</i> -TESPSA | 0.475    |                  |          |                  |          |                  |
| <i>M</i>         | 0.465    | 0.486            |          |                  |          |                  |
| <i>M</i> -TESPSA | 0.319    | 0.266            | 0.257    |                  |          |                  |
| <i>H</i>         | 0.186    | 0.308            | 0.249    | 0.429            |          |                  |
| <i>H</i> -TESPSA | 0.437    | 0.436            | 0.447    | 0.194            | 0.391    |                  |
| CA               | 0.193    | 0.219            | 0.196    | 0.441            | 0.491    | 0.239            |

**Table S3.** *P* values comparisons of the total bacterial load adhered among antibacterial surfaces measured by qPCR at 12 h.

| Surface name     | <i>L</i> -TESPSA | <i>M</i> -TESPSA | <i>H</i> -TESPSA |
|------------------|------------------|------------------|------------------|
| <i>M</i> -TESPSA | 0.403            |                  |                  |
| <i>H</i> -TESPSA | 0.062            | 0.072            |                  |
| CA               | 0.308            | 0.279            | 0.021*           |

\**p* value <0.05.

**Table S4.** *P* values comparisons of the total bacterial load adhered among antibacterial surfaces measured by qPCR at 24 h.

| Surface name     | <i>L</i> -TESPSA | <i>M</i> -TESPSA | <i>H</i> -TESPSA |
|------------------|------------------|------------------|------------------|
| <i>M</i> -TESPSA | 0.190            |                  |                  |
| <i>H</i> -TESPSA | 0.357            | 0.131            |                  |
| CA               | 0.141            | 0.357            | 0.124            |

**Table S5.** *P* values comparisons of the bacterial proliferation from 12 to 24 h measured by qPCR.

| Surface name     | <i>L</i> | <i>L</i> -TESPSA | <i>M</i> | <i>M</i> -TESPSA | <i>H</i> | <i>H</i> -TESPSA |
|------------------|----------|------------------|----------|------------------|----------|------------------|
| <i>L</i> -TESPSA | 0.348    |                  |          |                  |          |                  |
| <i>M</i>         | 0.299    | 0.451            |          |                  |          |                  |
| <i>M</i> -TESPSA | 0.233    | 0.106            | 0.075    |                  |          |                  |
| <i>H</i>         | 0.142    | 0.059            | 0.058    | 0.432            |          |                  |
| <i>H</i> -TESPSA | 0.234    | 0.412            | 0.437    | 0.053            | 0.056    |                  |
| CA               | 0.096    | 0.046*           | 0.040*   | 0.348            | 0.425    | 0.054            |

\**p* value <0.05.

**Table S6.** *P* values comparisons of the bacterial mortality measured by qPCR at 12 h.

| Surface name     | <i>L</i> | <i>L</i> -TESPSA | <i>M</i> | <i>M</i> -TESPSA | <i>H</i> | <i>H</i> -TESPSA |
|------------------|----------|------------------|----------|------------------|----------|------------------|
| <i>L</i> -TESPSA | 0.474    |                  |          |                  |          |                  |
| <i>M</i>         | 0.450    | 0.427            |          |                  |          |                  |

|                  |       |       |       |       |       |       |
|------------------|-------|-------|-------|-------|-------|-------|
| M-TESPSA         | 0.621 | 0.508 | 0.437 |       |       |       |
| <i>H</i>         | 0.582 | 0.408 | 0.470 | 0.418 |       |       |
| <i>H</i> -TESPSA | 0.425 | 0.483 | 0.430 | 0.437 | 0.425 |       |
| CA               | 0.546 | 0.398 | 0.580 | 0.451 | 0.420 | 0.429 |

**Table S7.** *P* values comparisons of the bacterial mortality measured by qPCR at 24 hours.

| Surface name     | <i>L</i> | <i>L</i> -TESPSA | <i>M</i> | <i>M</i> -TESPSA | <i>H</i> | <i>H</i> -TESPSA |
|------------------|----------|------------------|----------|------------------|----------|------------------|
| <i>L</i> -TESPSA | 0.512    |                  |          |                  |          |                  |
| <i>M</i>         | 0.418    | 0.469            |          |                  |          |                  |
| <i>M</i> -TESPSA | 0.488    | 0.571            | 0.544    |                  |          |                  |
| <i>H</i>         | 0.645    | 0.828            | 0.594    | 0.488            |          |                  |
| <i>H</i> -TESPSA | 0.592    | 0.559            | 0.448    | 0.438            | 0.443    |                  |
| CA               | 1.000    | 1.000            | 0.599    | 0.573            | 0.524    | 0.451            |

**Table S8.** *P* values comparisons of the total bacterial area measured by CLSM at 12 h.

| Surface name     | <i>L</i> | <i>L</i> -TESPSA | <i>M</i> | <i>M</i> -TESPSA | <i>H</i> | <i>H</i> -TESPSA |
|------------------|----------|------------------|----------|------------------|----------|------------------|
| <i>L</i> -TESPSA | 0.506    |                  |          |                  |          |                  |
| <i>M</i>         | 0.473    | 0.513            |          |                  |          |                  |
| <i>M</i> -TESPSA | 0.472    | 0.400            | 0.367    |                  |          |                  |
| <i>H</i>         | 0.369    | 0.385            | 0.398    | 0.503            |          |                  |
| <i>H</i> -TESPSA | 0.350    | 0.484            | 0.841    | 0.500            | 0.483    |                  |
| CA               | 0.388    | 0.608            | 1.000    | 0.469            | 0.469    | 0.488            |

**Table S9.** *P* values comparisons of the total bacterial area measured by CLSM at 24 h.

| Surface name     | <i>L</i> | <i>L</i> -TESPSA | <i>M</i> | <i>M</i> -TESPSA | <i>H</i> | <i>H</i> -TESPSA |
|------------------|----------|------------------|----------|------------------|----------|------------------|
| <i>L</i> -TESPSA | 0.436    |                  |          |                  |          |                  |
| <i>M</i>         | 0.370    | 0.409            |          |                  |          |                  |
| <i>M</i> -TESPSA | 0.285    | 0.325            | 0.415    |                  |          |                  |
| <i>H</i>         | 0.277    | 0.303            | 0.365    | 0.413            |          |                  |
| <i>H</i> -TESPSA | 0.383    | 0.379            | 0.242    | 0.232            | 0.379    |                  |
| CA               | 0.439    | 0.399            | 0.253    | 0.285            | 0.318    | 0.420            |

**Table S10.** *P* values comparisons of the live bacteria area measured by CLSM at 12 h.

| Surface name     | <i>L</i> | <i>L</i> -TESPSA | <i>M</i> | <i>M</i> -TESPSA | <i>H</i> | <i>H</i> -TESPSA |
|------------------|----------|------------------|----------|------------------|----------|------------------|
| <i>L</i> -TESPSA | 0.464    |                  |          |                  |          |                  |
| <i>M</i>         | 0.441    | 0.467            |          |                  |          |                  |
| <i>M</i> -TESPSA | 0.484    | 0.431            | 0.383    |                  |          |                  |
| <i>H</i>         | 0.392    | 0.440            | 0.477    | 0.481            |          |                  |
| <i>H</i> -TESPSA | 0.402    | 0.428            | 0.778    | 0.465            | 0.451    |                  |
| CA               | 0.379    | 0.551            | 1.000    | 0.483            | 0.461    | 0.470            |

**Table S11.** *P* values comparisons of the live bacteria area measured by CLSM at 24 h.

| Surface name     | <i>L</i> | <i>L</i> -TESPSA | <i>M</i> | <i>M</i> -TESPSA | <i>H</i> | <i>H</i> -TESPSA |
|------------------|----------|------------------|----------|------------------|----------|------------------|
| <i>L</i> -TESPSA | 0.440    |                  |          |                  |          |                  |
| <i>M</i>         | 0.357    | 0.392            |          |                  |          |                  |
| <i>M</i> -TESPSA | 0.261    | 0.297            | 0.428    |                  |          |                  |
| <i>H</i>         | 0.299    | 0.263            | 0.367    | 0.424            |          |                  |
| <i>H</i> -TESPSA | 0.378    | 0.407            | 0.253    | 0.348            | 0.358    |                  |
| CA               | 0.433    | 0.418            | 0.311    | 0.277            | 0.250    | 0.452            |

**Table S12.** *P* values comparisons of the dead bacteria area measured by CLSM at 12 h.

| Surface name     | <i>L</i> | <i>L</i> -TESPSA | <i>M</i> | <i>M</i> -TESPSA | <i>H</i> | <i>H</i> -TESPSA |
|------------------|----------|------------------|----------|------------------|----------|------------------|
| <i>L</i> -TESPSA | 0.183    |                  |          |                  |          |                  |
| <i>M</i>         | 0.488    | 0.225            |          |                  |          |                  |
| <i>M</i> -TESPSA | 0.112    | 0.012*           | 0.102    |                  |          |                  |
| <i>H</i>         | 0.256    | 0.043*           | 0.260    | 0.250            |          |                  |
| <i>H</i> -TESPSA | 0.135    | 0.022*           | 0.120    | 0.488            | 0.254    |                  |
| CA               | 0.276    | 0.391            | 0.248    | 0.019*           | 0.090    | 0.023*           |

\**p* value <0.05.**Table S13.** *P* values comparisons of the dead bacteria area measured by CLSM at 24 h.

| Surface name     | <i>L</i> | <i>L</i> -TESPSA | <i>M</i> | <i>M</i> -TESPSA | <i>H</i> | <i>H</i> -TESPSA |
|------------------|----------|------------------|----------|------------------|----------|------------------|
| <i>L</i> -TESPSA | 0.466    |                  |          |                  |          |                  |
| <i>M</i>         | 0.391    | 0.419            |          |                  |          |                  |
| <i>M</i> -TESPSA | 0.453    | 0.487            | 0.447    |                  |          |                  |
| <i>H</i>         | 0.127    | 0.123            | 0.124    | 0.141            |          |                  |
| <i>H</i> -TESPSA | 0.133    | 0.116            | 0.148    | 0.121            | 0.488    |                  |
| CA               | 0.206    | 0.176            | 0.118    | 0.183            | 0.395    | 0.427            |

**Table S14.** *P* values comparisons of the total bacterial volume measured by CLSM at 12 h.

| Surface name     | <i>L</i> | <i>L</i> -TESPSA | <i>M</i> | <i>M</i> -TESPSA | <i>H</i> | <i>H</i> -TESPSA |
|------------------|----------|------------------|----------|------------------|----------|------------------|
| <i>L</i> -TESPSA | 0.408    |                  |          |                  |          |                  |
| <i>M</i>         | 0.519    | 0.431            |          |                  |          |                  |
| <i>M</i> -TESPSA | 1.000    | 0.439            | 0.586    |                  |          |                  |
| <i>H</i>         | 0.580    | 0.559            | 0.677    | 0.387            |          |                  |
| <i>H</i> -TESPSA | 0.842    | 0.565            | 1.000    | 0.405            | 0.497    |                  |
| CA               | 0.469    | 0.552            | 0.519    | 0.393            | 0.479    | 0.529            |

**Table S15.** *P* values comparisons of the total bacterial volume measured by CLSM at 24 h.

| Surface name     | <i>L</i> | <i>L</i> -TESPSA | <i>M</i> | <i>M</i> -TESPSA | <i>H</i> | <i>H</i> -TESPSA |
|------------------|----------|------------------|----------|------------------|----------|------------------|
| <i>L</i> -TESPSA | 0.418    |                  |          |                  |          |                  |
| <i>M</i>         | 0.365    | 0.400            |          |                  |          |                  |
| <i>M</i> -TESPSA | 0.313    | 0.353            | 0.412    |                  |          |                  |
| <i>H</i>         | 0.200    | 0.210            | 0.273    | 0.262            |          |                  |
| <i>H</i> -TESPSA | 0.285    | 0.249            | 0.207    | 0.163            | 0.052    |                  |
| CA               | 0.394    | 0.382            | 0.303    | 0.299            | 0.107    | 0.323            |

**Table S16.** *P* values comparisons of the live bacteria volume measured by CLSM at 12 h.

| Surface name     | <i>L</i> | <i>L</i> -TESPSA | <i>M</i> | <i>M</i> -TESPSA | <i>H</i> | <i>H</i> -TESPSA |
|------------------|----------|------------------|----------|------------------|----------|------------------|
| <i>L</i> -TESPSA | 0.425    |                  |          |                  |          |                  |
| <i>M</i>         | 0.608    | 0.595            |          |                  |          |                  |
| <i>M</i> -TESPSA | 0.757    | 0.467            | 1.000    |                  |          |                  |
| <i>H</i>         | 0.512    | 0.514            | 0.861    | 0.442            |          |                  |
| <i>H</i> -TESPSA | 0.463    | 0.530            | 0.704    | 0.436            | 0.490    |                  |
| CA               | 0.524    | 0.601            | 1.000    | 0.416            | 0.578    | 0.560            |

**Table S17.** *P* values comparisons of the live bacteria volume measured by CLSM at 24 h.

| Surface name     | <i>L</i> | <i>L</i> -TESPSA | <i>M</i> | <i>M</i> -TESPSA | <i>H</i> | <i>H</i> -TESPSA |
|------------------|----------|------------------|----------|------------------|----------|------------------|
| <i>L</i> -TESPSA | 0.414    |                  |          |                  |          |                  |

|                  |       |       |       |       |        |       |
|------------------|-------|-------|-------|-------|--------|-------|
| <i>M</i>         | 0.367 | 0.406 |       |       |        |       |
| <i>M</i> -TESPSA | 0.309 | 0.329 | 0.424 |       |        |       |
| <i>H</i>         | 0.141 | 0.193 | 0.262 | 0.303 |        |       |
| <i>H</i> -TESPSA | 0.302 | 0.312 | 0.212 | 0.176 | 0.047* |       |
| CA               | 0.412 | 0.390 | 0.316 | 0.297 | 0.121  | 0.348 |

\*p value <0.05.

**Table S18.** *P* values comparisons of the dead bacteria volume measured by CLSM at 12 h.

| Surface name     | <i>L</i> | <i>L</i> -TESPSA | <i>M</i> | <i>M</i> -TESPSA | <i>H</i> | <i>H</i> -TESPSA |
|------------------|----------|------------------|----------|------------------|----------|------------------|
| <i>L</i> -TESPSA | 0.274    |                  |          |                  |          |                  |
| <i>M</i>         | 0.481    | 0.288            |          |                  |          |                  |
| <i>M</i> -TESPSA | 0.027    | 0.005*           | 0.053    |                  |          |                  |
| <i>H</i>         | 0.234    | 0.072            | 0.260    | 0.131            |          |                  |
| <i>H</i> -TESPSA | 0.072    | 0.020*           | 0.091    | 0.298            | 0.299    |                  |
| CA               | 0.287    | 0.480            | 0.269    | 0.007*           | 0.064    | 0.019*           |

\*p value <0.05.

**Table S19.** *P* values comparisons of the dead bacteria volume measured by CLSM at 24 h.

| Surface name     | <i>L</i> | <i>L</i> -TESPSA | <i>M</i> | <i>M</i> -TESPSA | <i>H</i> | <i>H</i> -TESPSA |
|------------------|----------|------------------|----------|------------------|----------|------------------|
| <i>L</i> -TESPSA | 0.493    |                  |          |                  |          |                  |
| <i>M</i>         | 0.376    | 0.373            |          |                  |          |                  |
| <i>M</i> -TESPSA | 0.531    | 0.513            | 0.352    |                  |          |                  |
| <i>H</i>         | 0.142    | 0.142            | 0.069    | 0.147            |          |                  |
| <i>H</i> -TESPSA | 0.088    | 0.064            | 0.054    | 0.116            | 0.358    |                  |
| CA               | 0.207    | 0.203            | 0.112    | 0.209            | 0.415    | 0.232            |

**Table S20.** *P* values comparisons of biofilm mortality measured by CLSM at 12 h.

| Surface name     | <i>L</i> | <i>L</i> -TESPSA | <i>M</i> | <i>M</i> -TESPSA | <i>H</i> | <i>H</i> -TESPSA |
|------------------|----------|------------------|----------|------------------|----------|------------------|
| <i>L</i> -TESPSA | 0.156    |                  |          |                  |          |                  |
| <i>M</i>         | 0.395    | 0.230            |          |                  |          |                  |
| <i>M</i> -TESPSA | 0.105    | 0.007*           | 0.073    |                  |          |                  |
| <i>H</i>         | 0.354    | 0.080            | 0.258    | 0.152            |          |                  |
| <i>H</i> -TESPSA | 0.149    | 0.012*           | 0.125    | 0.389            | 0.235    |                  |
| CA               | 0.164    | 0.489            | 0.237    | 0.012*           | 0.090    | 0.015*           |

\*p value <0.05.

**Table S21.** *P* values comparisons of biofilm mortality measured by CLSM at 24 h.

| Surface name     | <i>L</i> | <i>L</i> -TESPSA | <i>M</i> | <i>M</i> -TESPSA | <i>H</i> | <i>H</i> -TESPSA |
|------------------|----------|------------------|----------|------------------|----------|------------------|
| <i>L</i> -TESPSA | 0.424    |                  |          |                  |          |                  |
| <i>M</i>         | 0.471    | 0.441            |          |                  |          |                  |
| <i>M</i> -TESPSA | 0.467    | 0.361            | 0.403    |                  |          |                  |
| <i>H</i>         | 0.093    | 0.111            | 0.076    | 0.119            |          |                  |
| <i>H</i> -TESPSA | 0.269    | 0.208            | 0.230    | 0.270            | 0.327    |                  |
| CA               | 0.269    | 0.252            | 0.252    | 0.333            | 0.253    | 0.426            |
